# Supplementary material
Source: PubMed Central journal article supplement (PMC4140286)
Supplement: supp_M114.548594_jbc.M114.548594-1.pdf [file supp_M114.548594_jbc.M114.548594-1.pdf]

Importance of Mast Cell Prss31/Transmembrane Tryptase/Tryptase- $\gamma$  in Lung Function and Experimental Chronic Obstructive Pulmonary Disease and Colitis

Philip M. Hansbro, Matthew J. Hamilton, Michael Fricker, Shaan L. Gellatly,  
Andrew G. Jarnicki, Dominick Zheng, Sandra M. Frei, G. William Wong, Sahar Hamadi, Saijun Zhou,  
Paul S. Foster, Steven A. Krilis, and Richard L. Stevens

Supplemental FIGURE S1

133  
B6 1 cccatactga taggcctggg gctgggcagg ggcattgggt ggtcctgact ctgctgtggg  
BALB/c a  
CBA a  
SWR a  
A/J a  
129/Sv a  
C3H/HeJ a

184  
B6 61 aagacaccAT Ggctctgggg ccctactgtg gcatcctact gtttctggct gtttctgtg  
BALB/c a (Tyr/Asn)  
CBA a (Tyr/Asn)  
SWR a (Tyr/Asn)  
A/J a (Tyr/Asn)  
129/Sv a (Tyr/Asn)  
C3H/HeJ a (Tyr/Asn)

B6 121 agtgaactgg cttggggttg gtgtggcact ggggtggag gggcctgctt cctctcagga  
BALB/c  
CBA  
SWR  
A/J  
129/Sv  
C3H/HeJ

186  
B6 181 acttcacctg catttattct atttccact ctgggctgga gctcagagaa atctgggagc  
BALB/c c  
CBA c  
SWR c  
A/J c  
129/Sv c  
C3H/HeJ c

B6 241 catgtaagag ggggccgggt acctgaagt ctggccttag acaagcaaag ccaagttctt  
BALB/c  
CBA  
SWR  
A/J  
129/Sv  
C3H/HeJ

B6 301 catggtggcc tctgctttgt ctgggctcct cagctgggca gcttggctgt cactactgga  
BALB/c  
CBA  
SWR  
A/J  
129/Sv  
C3H/HeJ

B6 361 gacagaggct tgtgtgtatg tgtggggaca cctacaggac tagatcctgg aaggacacac |417  
BALB/c c  
CBA c  
SWR c  
A/J c  
129/Sv c  
C3H/HeJ c

B6 421 ctcaaggagg acctagaggt tgtgaggggc tgaggctcac tgcctcccag ctgttggtta  
BALB/c  
CBA  
SWR  
A/J  
129/Sv  
C3H/HeJ

B6 481 tggcccatgg ctggtcccac cctaccctgg aactaggatg cagttgacca ggccacaatc  
BALB/c  
CBA  
SWR  
A/J  
129/Sv  
C3H/HeJ

B6 541 aattagctgg gccccacca gctgggcccc acctacctgg ctagatctag ctttagctgc  
BALB/c  
CBA  
SWR  
A/J  
129/Sv  
C3H/HeJ

B6 601 ccaggatggg aacatctacc tcagggccac cttgggatct tccagggttg ggggcagtgc  
BALB/c g a  
CBA g a  
SWR g a  
A/J g a  
129/Sv g a  
C3H/HeJ g a

B6 661 ttaggccac aggaccagag tcaactcccac gggcagttcc cctaatacct ccgtctctat  
BALB/c  
CBA  
SWR  
A/J  
129/Sv  
C3H/HeJ

B6 721 ccttcaggca tcgcccatga agctctacag tcaggtgcac ctccaacaga tatttcggga |742  
BALB/c a  
CBA a  
SWR a  
A/J a  
129/Sv a  
C3H/HeJ a

B6 781 ttagagacca gtcctggcag gcagacccta gaggggcagt gcctgtggtg ggagagagtg  
BALB/c  
CBA  
SWR  
A/J  
129/Sv  
C3H/HeJ

B6 841 acctggccca gggaggctat gatttgccac aggcttctcc tgggaagctg cacctctgcc  
BALB/c  
CBA  
SWR  
A/J  
129/Sv  
C3H/HeJ

901 ccatttgat |915 cttcgagagc cactttccat ctctgcgac acagcctgct ggctctcaca  
BALB/c t  
CBA t  
SWR t  
A/J t  
129/Sv t  
C3H/HeJ t

B6 961 gttgatctct ttcttttgcg gatgttgctc ttgggaaaga gactcaaagc atcttcctca  
BALB/c  
CBA  
SWR  
A/J  
129/Sv  
C3H/HeJ

B6 1021 ggacgtacct ggtgttctgg gtgggaagga tgtggtctct tccatttctt tttatcaatg  
BALB/c  
CBA  
SWR  
A/J  
129/Sv  
C3H/HeJ

1081 tggacceaat ttcgggtttc atttttagt acagattaag aggaaagcct |1130 tcccctgtgg  
BALB/c c  
CBA c  
SWR c  
A/J c  
129/Sv c  
C3H/HeJ c

B6 1141 gtgatctct tagattttca tgagaaaaaa aattgaggtg aaatttacat aacatttact  
BALB/c  
CBA  
SWR  
A/J  
129/Sv  
C3H/HeJ

B6 1201 cacgatacag tgtagcattt gttgacattt aacacatccc cagtgttttg tgatatacaca  
BALB/c  
CBA  
SWR  
A/J  
129/Sv  
C3H/HeJ

B6 1261 tctatctagt tccaaacatc cttctaaaaa ggaaacccca ttctcactta ggggggcacc  
BALB/c  
CBA  
SWR  
A/J  
129/Sv  
C3H/HeJ

B6 1321 ccctaccccc agcctcctgg gcctccatag ctcccatcac ctgagccctt cctcaccct  
BALB/c  
CBA  
SWR  
A/J  
129/Sv  
C3H/HeJ

B6 1381 ttaattccag gcagtaagcc gtttgcccag ctccactgag catctttcta aggagcctgc  
BALB/c  
CBA  
SWR  
A/J  
129/Sv  
C3H/HeJ

B6 1441 tacgtccttt ggggtagtgt tcggaagcca agatccatga acttactgct tctagggtag  
BALB/c  
CBA  
SWR  
A/J  
129/Sv  
C3H/HeJ

B6 1501 cggttcccaa cctgtggggc gcaaccctt gggggagatc aaaccctttt acaggggtcc  
BALB/c  
CBA  
SWR  
A/J  
129/Sv  
C3H/HeJ

B6 1561 cctaacatta tttgcatatc aaatatttat attatgattc ataatagcaa agttacagtt  
BALB/c  
CBA  
SWR  
A/J  
129/Sv  
C3H/HeJ

B6 1621 atgaagtagc aacataaata attttatggt tgggggttac aacaacacag ggaactgtat  
BALB/c  
CBA  
SWR  
A/J  
129/Sv  
C3H/HeJ

|1704

B6 1681 gaatgggtcc cagtgttagg aagattgaaa accctagcat gcaaccacaa tgcttctgga  
BALB/c g  
CBA g  
SWR g  
A/J g  
129/Sv g  
C3H/HeJ g

|1741

B6 1741 aagagaccag cggatgggga gcagagacat ttgtagatgc cccaagatgc tagggctccc  
BALB/c g  
CBA g  
SWR g  
A/J g  
129/Sv g  
C3H/HeJ g

B6 1801 aagatgggag tcatggaggg ctcccagaga aagggcattg agcagaatgc cggctctccag  
BALB/c  
CBA  
SWR  
A/J  
129/Sv  
C3H/HeJ

|1869

B6 1861 attccctcgc caacagtgtc tcctctggat caggggtgtg ccatccccag gtttcaaact  
BALB/c a  
CBA a  
SWR a  
A/J g  
129/Sv a  
C3H/HeJ a

B6 1921 cgggaagtgc aatcgtggga gggcatgctg ccccagcagg cacatggccg tggcaggcta  
BALB/c  
CBA  
SWR  
A/J  
129/Sv  
C3H/HeJ

B6 1981 gcctccgtct gcacaaggtg cacgtgtgtg gaggtccct gtcagtcca gaatgggtgc  
BALB/c  
CBA  
SWR  
A/J  
129/Sv  
C3H/HeJ

B6 2041 tcacagcagc ccaactgcttc tctgggtgag tcacttcata aagcctggct gcctggcctt  
BALB/c  
CBA  
SWR  
A/J  
129/Sv  
C3H/HeJ

B6 2101 atggggcaat gactgcaaac aggaccttga ttagccgtga ctcacccttg agtccaaggg  
BALB/c  
CBA  
SWR  
A/J  
129/Sv  
C3H/HeJ

B6 2161 tccctttcag tagagaaaac ttcattaagg |2194 tccaccacc tgcaatggca gtgtacagcc  
BALB/c g  
CBA g  
SWR g  
A/J a  
129/Sv g  
C3H/HeJ g

7-mer (attgggc)deletion/16-mer insertion|||||||2261-2267  
B6 2221 ccctctccca catctgccac gggaggagaa tgcaacctcc attgggctta agtgtgatgc  
BALB/c -----cgttaagtgtgatgct  
CBA -----cgttaagtgtgatgct  
SWR -----cgttaagtgtgatgct  
A/J attgggc  
129/Sv -----cgttaagtgtgatgct  
C3H/HeJ -----cgttaagtgtgatgct

B6 2281 tggccacca tctagcttgt atcaggatgt atcttaaacc agccttaaca ggccttcca  
BALB/c  
CBA  
SWR  
A/J  
129/Sv  
C3H/HeJ

2375| 4-mer (agcc) insert|2394-2395  
B6 2341 cttgtctcga acacttctgg aactgccttt cccccagagt gccagccacc tcccaacgtc  
BALB/c c agcc  
CBA c agcc  
SWR c agcc  
A/J a agcc  
129/Sv c agcc  
C3H/HeJ c agcc

|2423 |2450  
B6 2401 ccagctgttc ttgggccett acgtgagagg cactgccagg ttcaggcttt atgtacgcag  
BALB/c a c  
CBA a c  
SWR a c  
A/J a c  
129/Sv a c  
C3H/HeJ a c

B6 2461 tagctgtttc tgtgcctagc accgaggata gatgggacac tggctattgg caggggtggg  
BALB/c  
CBA  
SWR  
A/J  
129/Sv  
C3H/HeJ

B6 2521 cggtaggtgg acattggtgg tggtagtcat tgttgagggg ggacacactc acatctctcc  
BALB/c  
CBA  
SWR  
A/J  
129/Sv  
C3H/HeJ

B6 2581 ctgcctccca ggtctgtgaa ctgctctgat taccaggtgc acttgggaga gcttacggtc  
BALB/c  
CBA  
SWR  
A/J  
129/Sv  
C3H/HeJ

B6 2641 acaactgtctc cccaattctc cactgtaaaa cggatcatca tgtacactgg ctctccagga  
BALB/c  
CBA  
SWR  
A/J  
129/Sv  
C3H/HeJ

B6 2701 ccaccggggg ccagtgggga cattgccctg gtgcagctgt cctccccggt ggccctttcc  
BALB/c  
CBA  
SWR  
A/J  
129/Sv  
C3H/HeJ

B6 2761 agccaggtcc agcctgtgtg cctcccagag gcctcagctg acttctaccc tgggatgcag  
BALB/c  
CBA  
SWR  
A/J  
129/Sv  
C3H/HeJ

B6 2821 tgctgggtga ctggctgggg ctatacaggg gagggaggta aggagcccct tctgaggtcc  
BALB/c  
CBA  
SWR  
A/J  
129/Sv  
C3H/HeJ

|2901

B6 2881 tccccatgg ggataagga gggtaagagg ggccacctgg ggaggagtgg gagccactgg  
BALB/c a  
CBA a  
SWR a  
A/J a  
129/Sv a  
C3H/HeJ a

2967||2968

B6 2941 tgccactgct ttgctcctag tggccagcc tagaggcaa ccacttattg gcctccacca  
BALB/c tg  
CBA tg  
SWR ca  
A/J ca  
129/Sv tg  
C3H/HeJ tg

B6 3001 agatccacat ctgaccaca gaaagacagt gccagcacgg gtagggggtt gaaccccatg  
BALB/c  
CBA  
SWR  
A/J  
129/Sv  
C3H/HeJ

3119|

B6 3061 agggatgtgc ctgctgcgtg ttcactctca gcagtgagag gctggttact caacctccgc  
BALB/c t  
CBA t  
SWR g  
A/J t  
129/Sv t  
C3H/HeJ t

B6 3121 ctgaactttc ctttctctca gaggctctga agccccata caaccttcag gaggccaaaag  
BALB/c  
CBA  
SWR  
A/J  
129/Sv  
C3H/HeJ

B6 3181 tctctgtggt ggatgtaaag acctgcagcc aggettacaa tagtcccaat ggcagcctca  
BALB/c  
CBA  
SWR  
A/J  
129/Sv  
C3H/HeJ

B6 3241 tccagccaga catgctatgc gcccgggcc ctggggatgc ctgccaggtg agtgggctgg  
BALB/c  
CBA  
SWR  
A/J  
129/Sv  
C3H/HeJ



|3327

B6 3301 gaatgtggag gaacggcgca ccatggagca cggtccttag aatcccatcc ttgttttgc  
BALB/c c  
CBA c  
SWR c  
A/J c  
129/Sv c  
C3H/HeJ c

B6 3361 cttctgtcct gcaggatgac tctggagggc cactagtctg ccaggtggct ggaacctggc  
BALB/c  
CBA  
SWR  
A/J  
129/Sv  
C3H/HeJ

B6 3421 agcaggccgg cgttgtcagc tggggtgagg gctgtggccg ccctgaccgc cctggcgtct  
BALB/c  
CBA  
SWR  
A/J  
129/Sv  
C3H/HeJ

|3527

B6 3481 atgcccgggt tactgcctat gtaaactgga tccaccacca catcccagaa gcagggggct  
BALB/c g(Pro/Pro)  
CBA g(Pro/Pro)  
SWR a(Pro/Pro)  
A/J a(Pro/Pro)  
129/Sv g(Pro/Pro)  
C3H/HeJ g(Pro/Pro)

B6 3541 caggaatgca agggcttccc tgggtcctc tctggtctgc cctcttctgg ccaagcctct  
BALB/c  
CBA  
SWR  
A/J  
129/Sv  
C3H/HeJ

B6 3601 tctgtctgct ggtctctgga gtctgatgg ccaagtactg gctgagctct cctcccacg  
BALB/c  
CBA  
SWR  
A/J  
129/Sv  
C3H/HeJ

B6 3661 cggcctcgga actcTGAatg aggtgtagca accaacc~~caa~~ gtgtctttct taaataagtt  
BALB/c  
CBA  
SWR  
A/J  
129/Sv  
C3H/HeJ

|         |                                                                               |                            |
|---------|-------------------------------------------------------------------------------|----------------------------|
|         | 1-mer deletion (c) (3334)                                                     | 1-mer (a) insertion (3780) |
| B6      | 3721 <u>agtgttttatt cagctttgct ttgccctcc cctcccctta gctttgactt aggaagccaa</u> |                            |
| BALB/c  |                                                                               | No insertion               |
| CBA     |                                                                               | No insertion               |
| SWR     |                                                                               | No insertion               |
| A/J     |                                                                               | No insertion               |
| 129/Sv  | -                                                                             | A                          |
| C3H/HeJ |                                                                               | No insertion               |
|         |                                                                               |                            |
| B6      | 3781 <u>gttttctgca tcagattatt gcaacattta acctgaattt gtagaacgga tgacataaa</u>  |                            |
| BALB/c  |                                                                               |                            |
| CBA     |                                                                               |                            |
| SWR     |                                                                               |                            |
| A/J     |                                                                               |                            |
| 129/Sv  |                                                                               |                            |
| C3H/HeJ |                                                                               |                            |
|         |                                                                               |                            |
| B6      | 3841 <u>caaatggatg tcaaataaa</u>                                              |                            |
| BALB/c  |                                                                               |                            |
| CBA     |                                                                               |                            |
| SWR     |                                                                               |                            |
| A/J     |                                                                               |                            |
| 129/Sv  |                                                                               |                            |
| C3H/HeJ |                                                                               |                            |

## FIGURE LEGEND

FIGURE S1. **Strain-dependent variation of the mouse *Prss31* gene.** Shown are comparisons of the deduced nucleotide sequences of the *Prss31* genes in the WT **B6**, **BALB/c**, **CBA**, **SWR**, **A/J**, **129/Sv**, and **C3H/HeJ** mouse strains. The 5' and 3' untranslated regions of the reference B6 mouse *Prss31* transcript are underlined and in ***blue italics***. The translation-initiation and -termination codons of the B6 mouse *Prss31* gene are highlighted in **green**, the exons in **blue** (not underlined), and introns in **black**. Although the **129/Sv** mouse *Prss31* gene was the first sequenced in any mouse strain, the residue numbering in the depicted nucleotide sequence is based on that of the 5-exon, 3,859-mer **B6** mouse *Prss31* gene noted at GenBank accession number NC\_000083 and GeneID 26945.
